# Supplementary material for: An assessment of the dietary bioavailability of silver nanomaterials in rainbow trout using anex vivogut sac technique
Source: Royal Society of Chemistry journal article supplement (doi:10.1039/c8en00981c), 2019-01-01
Supplement: c8en00981c1.pdf [file c8en00981c1.pdf]

## **Supplementary Information**

### **An assessment of the Dietary Bioavailability of Silver Nanomaterials in Rainbow Trout Using an Ex Vivo Gut Sac Technique**

Nathaniel J. Clark<sup>1</sup>, David Boyle<sup>1</sup> and Richard D. Handy<sup>1\*</sup>

<sup>1</sup>School of Biological and Marine Sciences, University of Plymouth, Plymouth, United  
Kingdom.

Table S1. The moisture content, fluid flux and total Ag accumulation rates of all AgNO<sub>3</sub>, Ag NPs and Ag<sub>2</sub>S NPs into the mucosa, either in the chloride-containing or chloride-free saline.

|                                                                                | Control      | AgNO <sub>3</sub>           | Ag NPs                     | Ag <sub>2</sub> S NPs       |
|--------------------------------------------------------------------------------|--------------|-----------------------------|----------------------------|-----------------------------|
| <b>Moisture (%)</b>                                                            |              |                             |                            |                             |
| <u>Chloride-containing</u>                                                     |              |                             |                            |                             |
| Oesophagus                                                                     | 78.2 ± 1.1   | 77.4 ± 2.3                  | 80.0 ± 1.7                 | 80.1 ± 0.8                  |
| Stomach                                                                        | 80.7 ± 1.3   | 81.2 ± 0.8                  | 80.5 ± 0.5                 | 80.5 ± 0.7                  |
| Anterior                                                                       | 76.9 ± 1.5   | 76.2 ± 1.5                  | 75.9 ± 1.7                 | 74.8 ± 2.5                  |
| Mid intestine                                                                  | 80.9 ± 1.8   | 81.8 ± 1.7                  | 79.9 ± 1.7                 | 83.0 ± 1.7                  |
| Hind intestine                                                                 | 81.0 ± 1.8   | 82.3 ± 1.7                  | 81.8 ± 1.3                 | 81.7 ± 1.4                  |
| <u>Chloride-free</u>                                                           |              |                             |                            |                             |
| Oesophagus                                                                     | 78.5 ± 1.4   | 80.5 ± 1.0                  | 80.2 ± 1.6                 | N/A                         |
| Stomach                                                                        | 80.2 ± 0.5   | 82.1 ± 1.2                  | 80.1 ± 0.8                 | N/A                         |
| Anterior                                                                       | 73.9 ± 2.2   | 74.7 ± 2.2                  | 69.7 ± 1.8                 | N/A                         |
| Mid intestine                                                                  | 78.0 ± 3.1   | 80.4 ± 2.0                  | 81.5 ± 1.8                 | N/A                         |
| Hind intestine                                                                 | 83.0 ± 2.1   | 78.6 ± 5.9                  | 79.1 ± 3.4                 | N/A                         |
| <b>Fluid flux (μL cm<sup>-2</sup> h<sup>-1</sup>)</b>                          |              |                             |                            |                             |
| <u>Chloride-containing</u>                                                     |              |                             |                            |                             |
| Oesophagus                                                                     | 1.37 ± 2.39  | -1.06 ± 0.85                | 3.06 ± 1.23                | -0.30 ± 1.26                |
| Stomach                                                                        | -1.46 ± 0.58 | -0.76 ± 0.99                | 3.40 ± 2.10                | -1.43 ± 0.92                |
| Anterior                                                                       | 4.84 ± 4.51  | 1.52 ± 2.37                 | 7.31 ± 2.71                | 0.78 ± 1.17                 |
| Mid intestine                                                                  | 0.34 ± 1.67  | 2.07 ± 1.23                 | 0.70 ± 2.48                | 5.03 ± 1.62                 |
| Hind intestine                                                                 | -2.26 ± 0.33 | -1.34 ± 0.72                | 1.54 ± 5.05                | 3.55 ± 1.92                 |
| <u>Chloride-free</u>                                                           |              |                             |                            |                             |
| Oesophagus                                                                     | -2.63 ± 2.32 | 4.41 ± 1.96                 | -0.57 ± 1.44               | N/A                         |
| Stomach                                                                        | 1.63 ± 0.80  | 2.08 ± 0.90                 | 1.32 ± 1.39                | N/A                         |
| Anterior                                                                       | 0.33 ± 2.73  | 5.50 ± 11.82                | 12.13 ± 9.46               | N/A                         |
| Mid intestine                                                                  | -1.94 ± 0.74 | -2.17 ± 0.46                | -1.54 ± 0.88               | N/A                         |
| Hind intestine                                                                 | -2.44 ± 1.46 | -3.67 ± 3.62                | -4.14 ± 2.22               | N/A                         |
| <b>Accumulation rate into the mucosa (pmol cm<sup>-2</sup> h<sup>-1</sup>)</b> |              |                             |                            |                             |
| <u>Chloride-containing</u>                                                     |              |                             |                            |                             |
| Oesophagus                                                                     | ND           | 5.87 ± 1.92 <sup>Aa</sup>   | 7.70 ± 4.92 <sup>Aa</sup>  | 7.02 ± 2.09 <sup>Aa</sup>   |
| Stomach                                                                        | ND           | 13.08 ± 4.08 <sup>Aa</sup>  | 4.58 ± 0.68 <sup>Aa</sup>  | 11.63 ± 1.09 <sup>Aa</sup>  |
| Anterior                                                                       | ND           | 28.04 ± 7.77 <sup>Aa</sup>  | 13.32 ± 3.94 <sup>Aa</sup> | 12.07 ± 2.86 <sup>Aa</sup>  |
| Mid intestine                                                                  | ND           | 23.05 ± 5.20 <sup>Aa</sup>  | 8.39 ± 4.55 <sup>Ba</sup>  | 63.45 ± 22.44 <sup>Aa</sup> |
| Hind intestine                                                                 | ND           | 19.74 ± 7.23 <sup>Aa</sup>  | 7.01 ± 1.99 <sup>Aa</sup>  | 23.66 ± 7.88 <sup>Aa</sup>  |
| <u>Chloride-free</u>                                                           |              |                             |                            |                             |
| Oesophagus                                                                     | ND           | 6.13 ± 3.06 <sup>Aa</sup>   | 1.39 ± 0.55 <sup>Aa</sup>  | N/A                         |
| Stomach                                                                        | ND           | 28.84 ± 11.49 <sup>Aa</sup> | 4.58 ± 3.26 <sup>Bab</sup> | N/A                         |
| Anterior                                                                       | ND           | 11.14 ± 2.80 <sup>Aa</sup>  | 5.26 ± 1.34 <sup>Ab</sup>  | N/A                         |
| Mid intestine                                                                  | ND           | 27.31 ± 8.04 <sup>Aa</sup>  | 14.07 ± 4.39 <sup>Ab</sup> | N/A                         |
| Hind intestine                                                                 | ND           | 12.88 ± 4.61 <sup>Aa</sup>  | 13.44 ± 5.27 <sup>Ab</sup> | N/A                         |

Data are mean ± S.E.M (n = 5/6). Data are expressed as surface area of tissue (cm<sup>2</sup>) for comparability to other published literature. There was no transepithelial uptake of Ag to the serosal saline. ND, not determined as the measured tissue concentration of total Ag was below the detection limit. N/A, not applicable to Ag<sub>2</sub>S experiments. Different lower case letters denotes statistical difference between gut regions in the same treatment and saline (column). Different upper case letters denote statistical differences between treatments. There was no significant difference between fluid fluxes or moisture content. There were no statistically significant effects of chloride-free compared to the normal gut saline on the fluid flux or the uptake rates in the mucosa (One-Way ANOVA).
